# Supplementary material for: Prognosis value of galectin-3 in patients with dilated cardiomyopathy: a meta-analysis
Source: PeerJ. 2024 Apr 23;12:e17201. doi: 10.7717/peerj.17201 (PMC11048071; doi:10.7717/peerj.17201)
Supplement: Supplemental Information 1 [file peerj-12-17201-s001.xlsx]

## Sheet: Sheet 1
Study	D1	D2	D3	D4	D5	D6	D7	Overall
Rubiś 2021	Moderate	Low	Low	Low	Low	Low	Low	Moderate
Hu 2016	Low	Low	Low	Low	Low	Low	Low	Low
Vergaro 2015	Low	Low	Low	Low	Low	Low	Low	Low
Wojciechowska 2017	Low	Low	Low	Low	Low	Low	Low	Low
Karatolios 2018	Low	Low	Low	Low	Low	Low	Low	Low
Revnic 2022	Low	Low	Low	Low	Low	Low	Low	Low
Binas 2018	Low	Low	Low	Low	Low	Low	Low	Low
